# Supplementary material for: Reactivity and catalytic activity of tert-butoxy-aluminium hydride reagents
Source: Royal Society of Chemistry journal article supplement (doi:10.1039/c4dt00152d), 2014-01-01
Supplement: c4dt00152d1.pdf [file c4dt00152d1.pdf]

*Electronic Supplementary Information*

## **Reactivity and Catalytic Activity of *tert*-Butoxy-Aluminium Hydride Reagents**

**Robert J. Less,\* Hayley R. Simmonds and Dominic S. Wright\***

### ***General Experimental Details of NMR Spectroscopic Studies***

NMR spectra were obtained in deuterated NMR solvents ( $d_6$ -benzene,  $d_8$ -toluene,  $d_8$ -thf) which had been dried over a sodium mirror. A Bruker 500 MHz TCI Cryoprobe Spectrometer was used and all spectra are recorded at +25°C. The frequencies of the nuclei and external reference standards are as follows:  $^1\text{H}$  – 500.20 MHz, ( $\text{Me}_4\text{Si}$ ,  $\text{CDCl}_3$ , 1%),  $^{11}\text{B}$  – 160.48 MHz, ( $\text{BF}_3 \cdot \text{Et}_2\text{O}$ ,  $\text{CDCl}_3$ ),  $^{27}\text{Al}$  – 130.35 MHz, ( $\text{Al}(\text{NO}_3)_3$ ,  $\text{D}_2\text{O}$ , 1.1M),  $^7\text{Li}$  – 194.40 MHz, ( $\text{LiCl}$ ,  $\text{D}_2\text{O}$ , 9.7M).

*In situ* NMR spectroscopic studies in THF and toluene were undertaken using Wilmad 528pp tubes fitted with Youngs' tap adaptors, which allowed the attachment of the tube to a vacuum line during the course of reactions. During reactions evolved  $\text{H}_2$  gas was therefore allowed to escape from the reaction system. The time intervals at which the spectra were recorded for catalytic studies using 10 mol% of the reagents involved are given on the appropriate spectra. In each case a series of spectra for the corresponding 1:1 reactions accompany the catalytic studies for comparison.

## 1. NMR Spectra of Aluminium Hydride Precursors 1, 2, 3 and 4

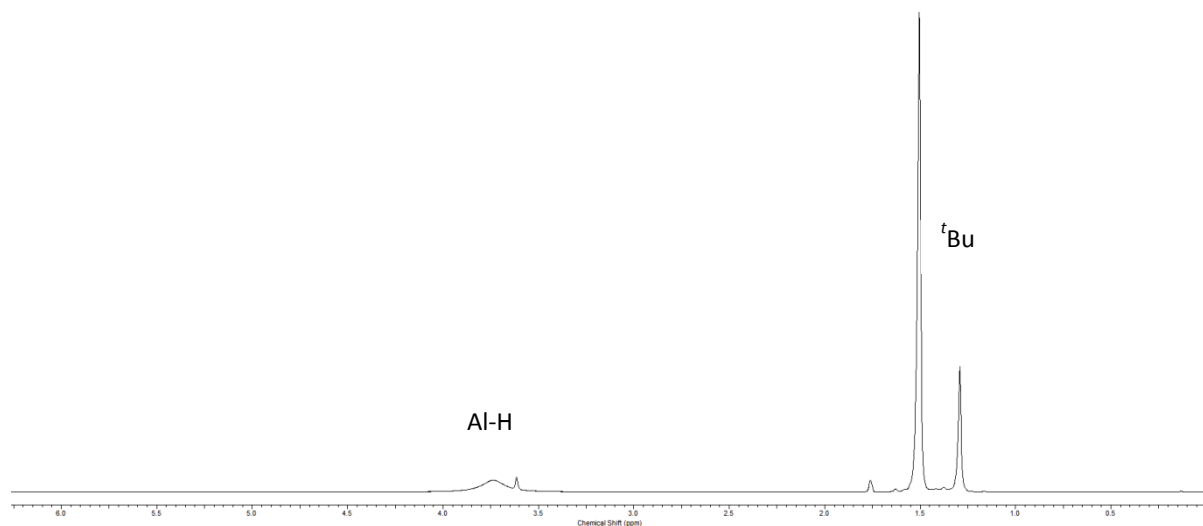

**Figure 1.1**  $^1\text{H}$  NMR Spectrum of  $^t\text{BuOAlH}_2$  (**1**) in  $\text{D}_8\text{-THF}$ .

*Note:* In the original paper (reference 11) the NMR spectra of **1** were obtained in  $\text{D}_6\text{-benzene}$ ). The observation of two  $^t\text{Bu}$  resonances in THF here can be tentatively ascribed to the presence of solvated monomer [ $^t\text{BuOAlH}_2\cdot\text{THF}$ ] ( $\delta$  1.50) and *intact* dimer [ $\text{H}_2\text{Al}(\mu\text{-O}^t\text{Bu})_2$ ] ( $\delta$  1.30), on the basis of the observed chemical shift in the  $^1\text{H}$  NMR spectrum of **1** in  $\text{D}_6\text{-benzene}$  (see below).

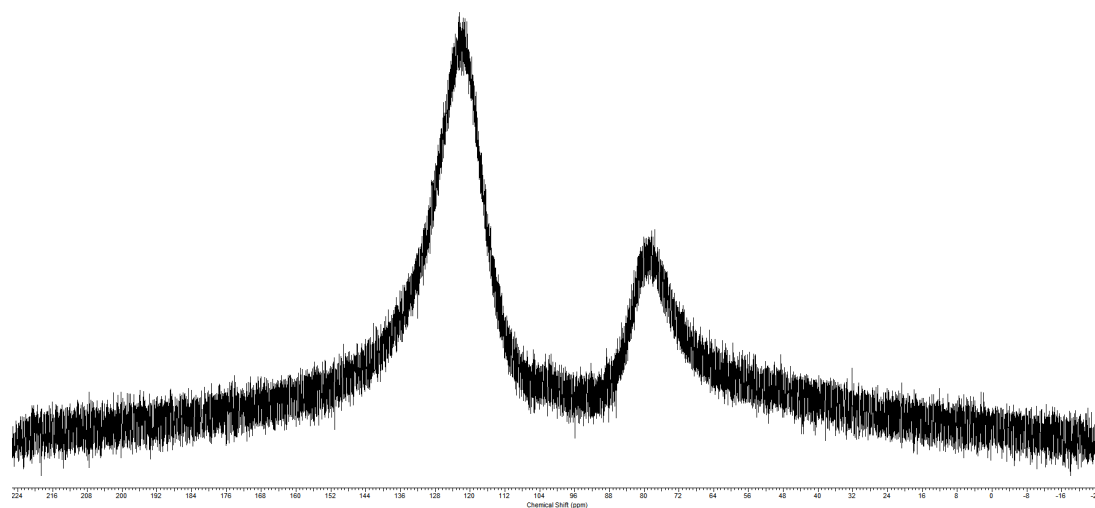

**Figure 1.2**  $^{27}\text{Al}$  (H-coupled) in  $\text{D}_8\text{-THF}$  (the peak at 75 ppm is that for glass).

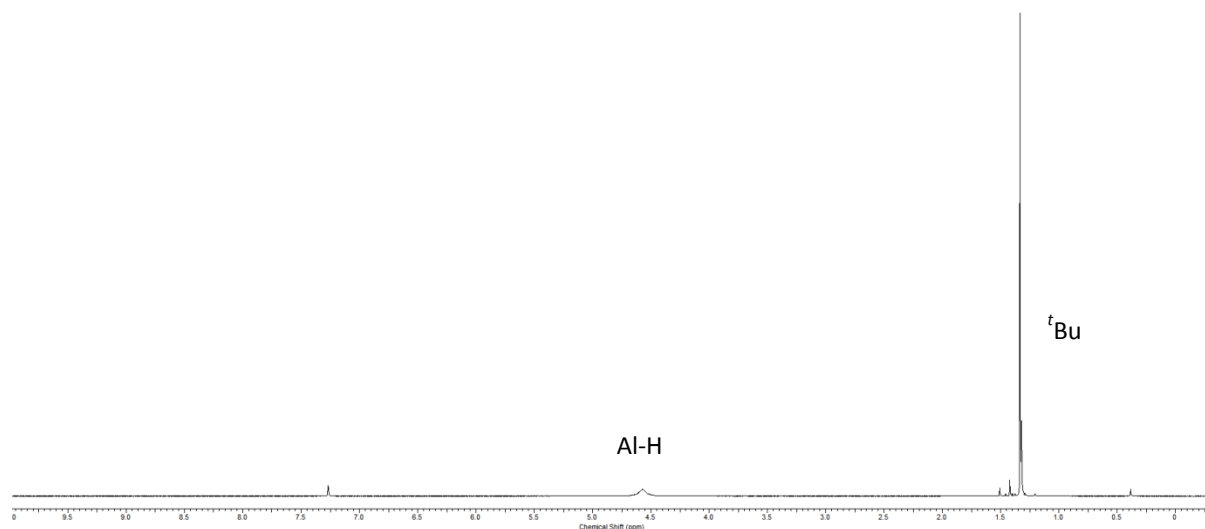

**Figure 1.3**  $^1\text{H}$  NMR Spectrum of  $t\text{BuOAlH}_2$  (**1**) in  $\text{D}_6$ -benzene.

*Note:* The  $^1\text{H}$  NMR spectrum is identical to that reported in reference 11 in the same solvent.

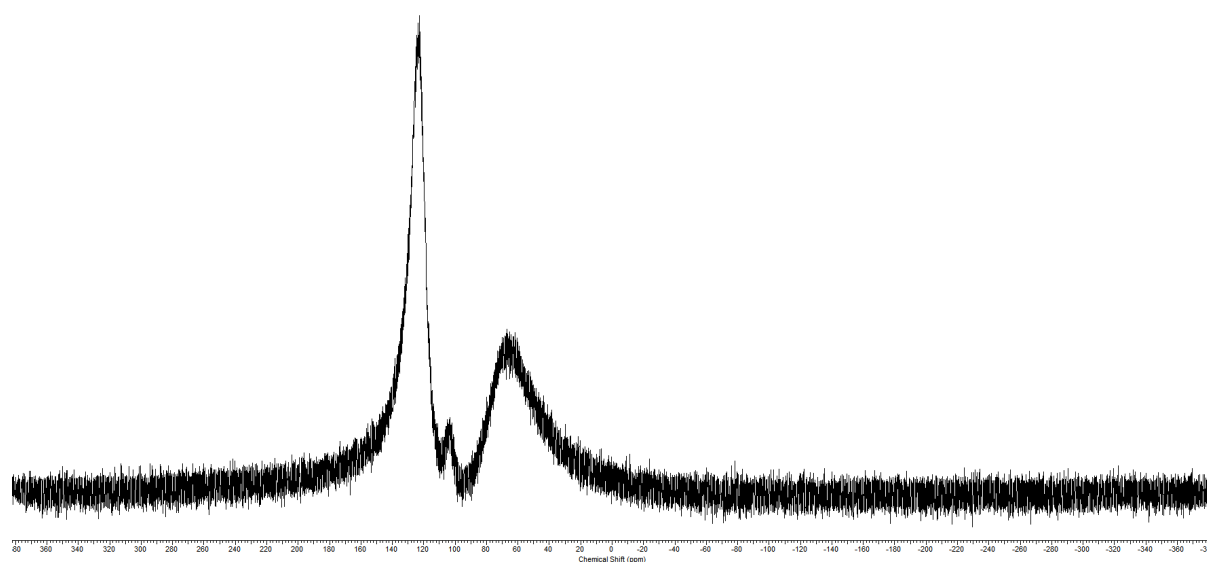

**Figure 1.4**  $^{27}\text{Al}$  (H-coupled) (the peak at 75 ppm is that for glass).

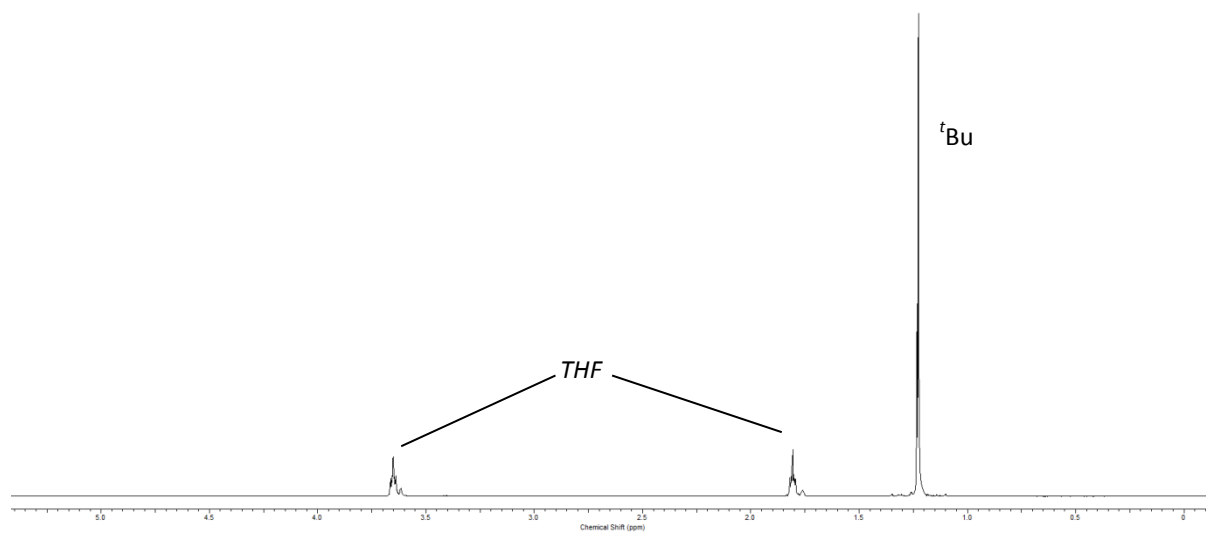

**Figure 1.5**  $^1\text{H}$  NMR Spectrum of  $(\text{THF})\text{Li}[(^t\text{BuO})_2\text{AlH}_2]$  (**3**) in  $\text{D}_8\text{-THF}$

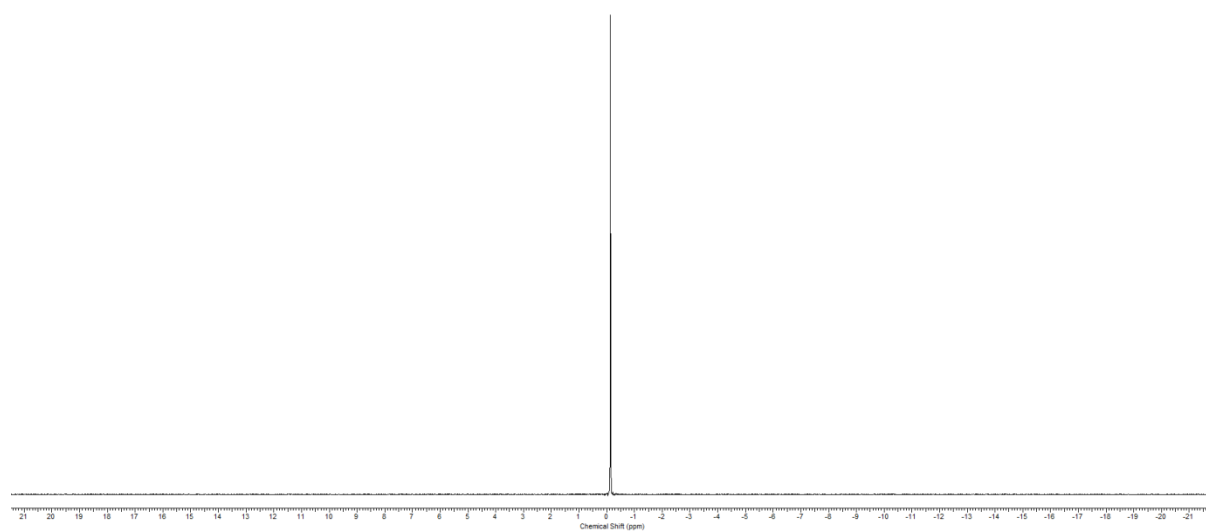

**Figure 1.6**  $^7\text{Li}$  NMR Spectrum of  $(\text{THF})\text{Li}[(^t\text{BuO})_2\text{AlH}_2]$  (**3**) in  $\text{D}_8\text{-THF}$

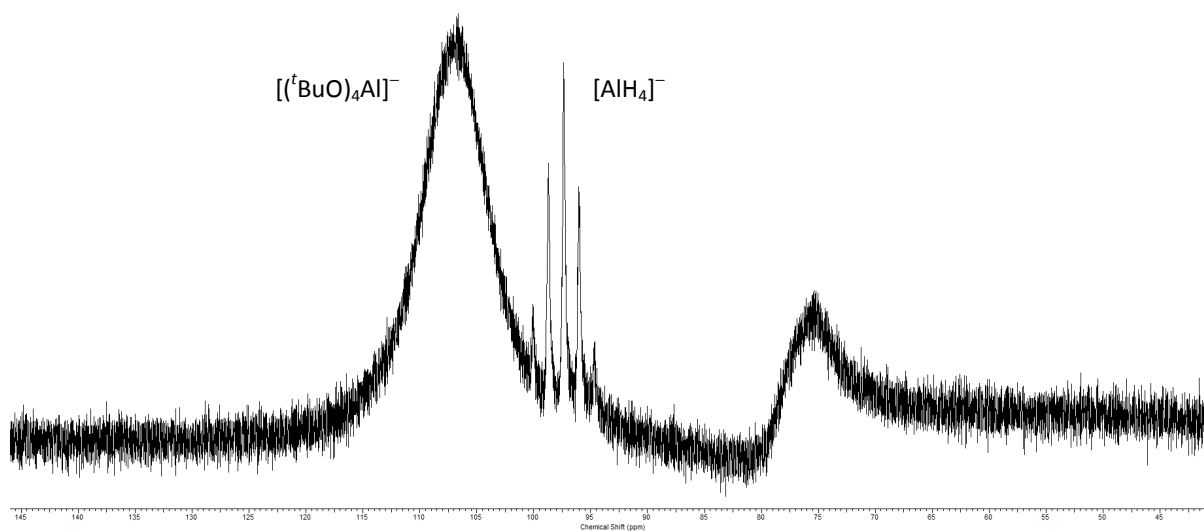

**Figure 1.7**  $^{27}\text{Al}$  NMR Spectrum of  $(\text{THF})\text{Li}[(\text{tBuO})_2\text{AlH}_2]$  (**3**) in  $\text{D}_8\text{-THF}$  (the peak at 75ppm is that for glass).

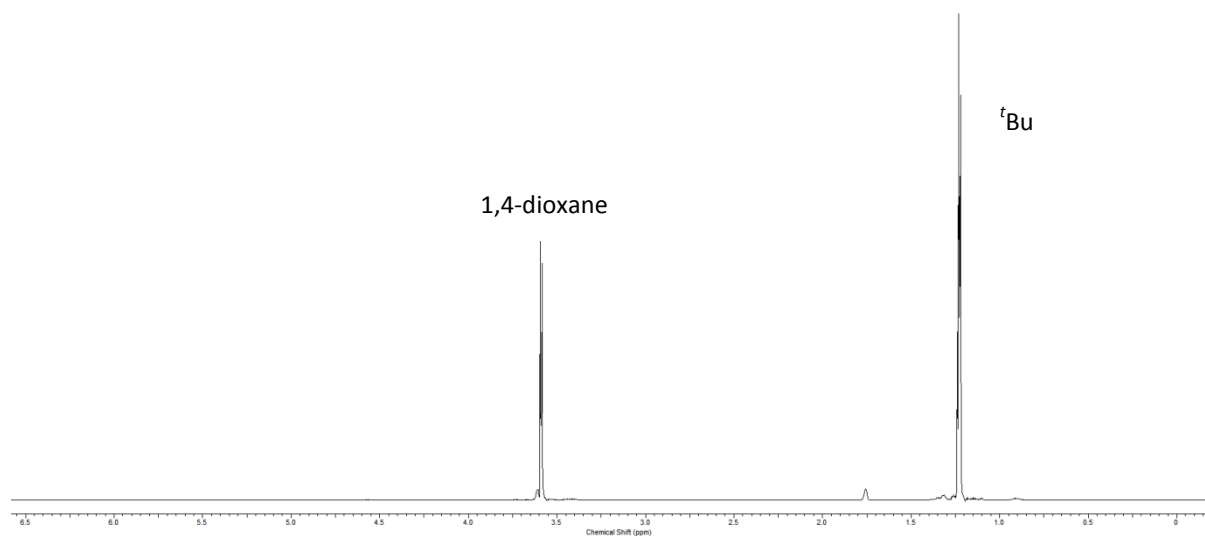

**Figure 1.8**  $^1\text{H}$  NMR Spectrum of  $(1,4\text{-dioxane})\text{Li}(\text{tBuO})_2\text{AlH}_2$  (**4**) in  $\text{D}_8\text{-THF}$ .

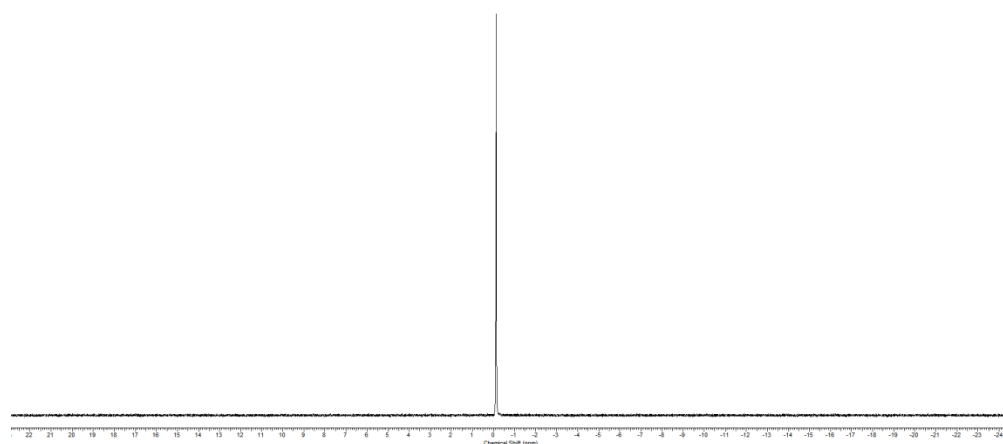

**Figure 1.9**  $^7\text{Li}$  NMR Spectrum of  $(1,4\text{-dioxane})\text{Li}(\text{tBuO})_2\text{AlH}_2$  (**4**) in  $\text{D}_8\text{-THF}$ .

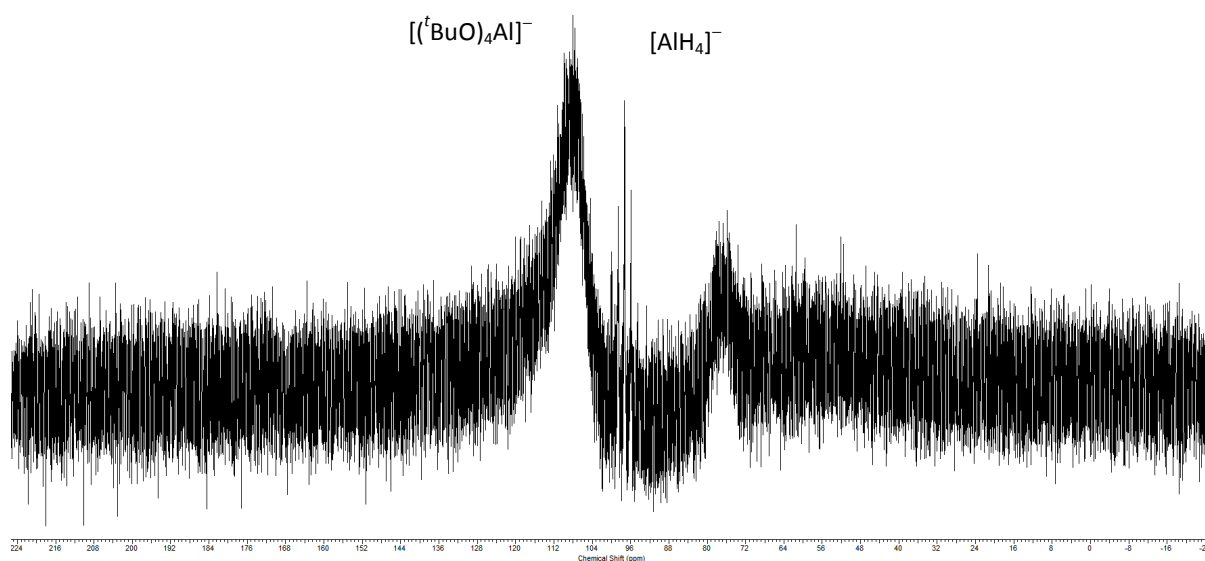

**Figure 1.10**  $^{27}\text{Al}$  NMR Spectrum of  $(1,4\text{-dioxane})\text{Li}(\text{tBuO})_2\text{AlH}_2$  (**4**) in  $\text{D}_8\text{-THF}$  (the peak at 75ppm is that for glass).

*Note:* The spectra for **3** and **4** are almost identical in THF, the only difference being that the  $^1\text{H}$  spectrum of the latter contains the 1,4-dioxane resonance. The  $^1J_{\text{Al-H}}$  coupling constants for the  $\text{AlH}_4^-$  ion ( $\delta$ 97 ppm) are also identical to one decimal place and are consistent with the reported Al-H coupling in  $\text{AlH}_4^-$  of 170 – 173 Hz (reference 19 in the paper).

## 2. NMR Spectra of the Reaction Products 5 and 6

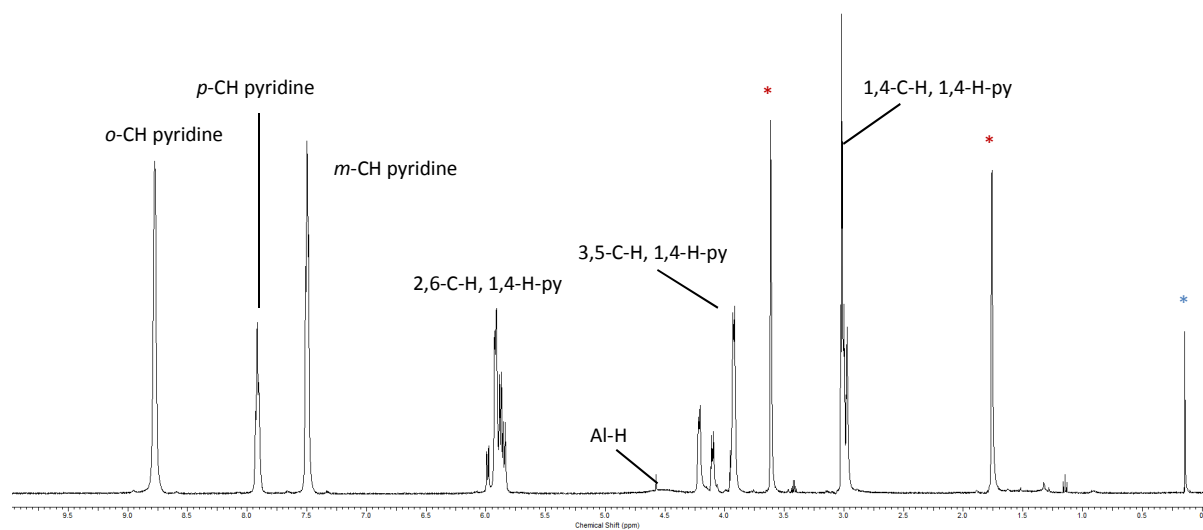

**Figure 2.1**  $^1\text{H}$  NMR Spectrum of  $[(1,4\text{-H-pyrid-1-yl})_4\text{Al}][(\text{pyridine})_4\text{AlH}_2]^+$  (**5**) in  $\text{D}_8\text{-THF}$  (THF peaks solvent peaks are marked \*, vacuum grease \*).

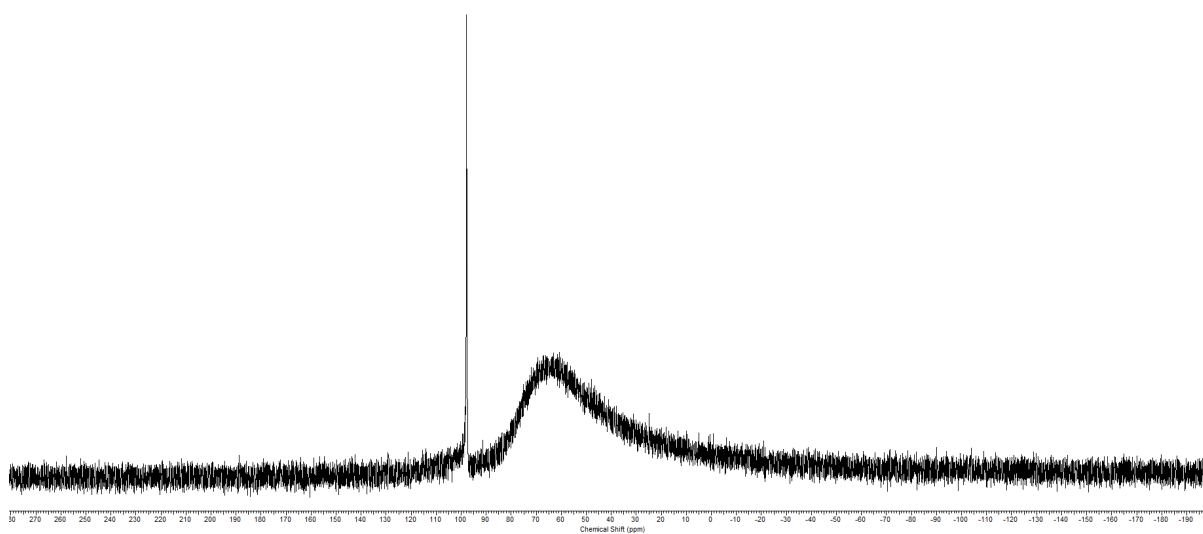

**Figure 2.2**  $^{27}\text{Al}$  NMR (H-decoupled) of  $[(1,4\text{-H-pyrid-1-yl})_4\text{Al}][(\text{pyridine})_4\text{AlH}_2]^+$  (**5**) in  $\text{D}_8\text{-THF}$  (the peak at 75 ppm is that for glass).

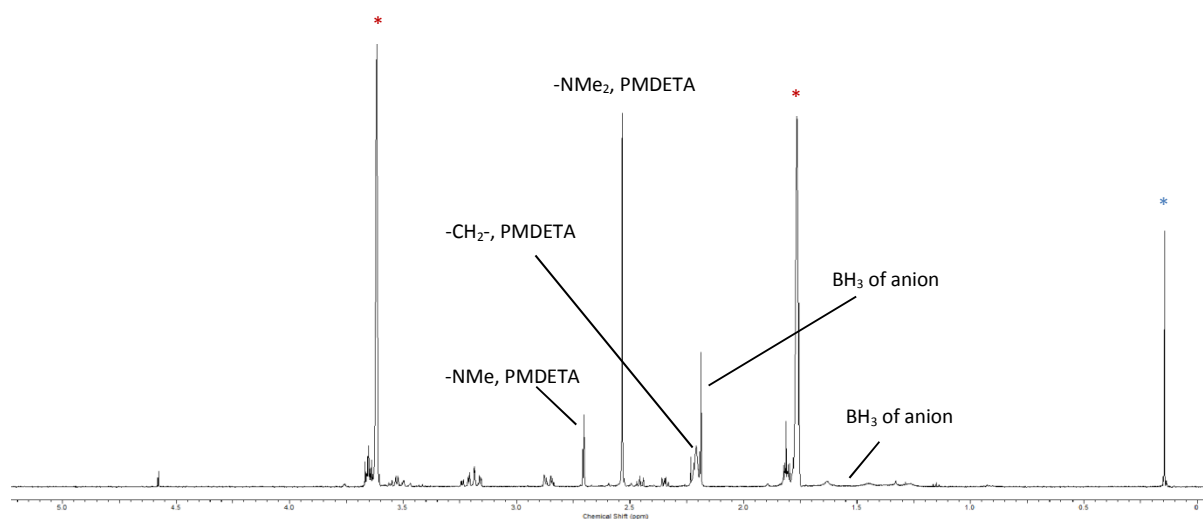

**Figure 2.3**  $^1\text{H}$  NMR Spectrum of  $[(\text{PMDETA})\text{AlH}_2]^+[(\text{H}_3\text{B})_2(\text{NMe}_2)]^-$  (**6**) in  $\text{D}_8\text{-THF}$  (THF peaks solvent peaks are marked \*, vacuum grease \*).

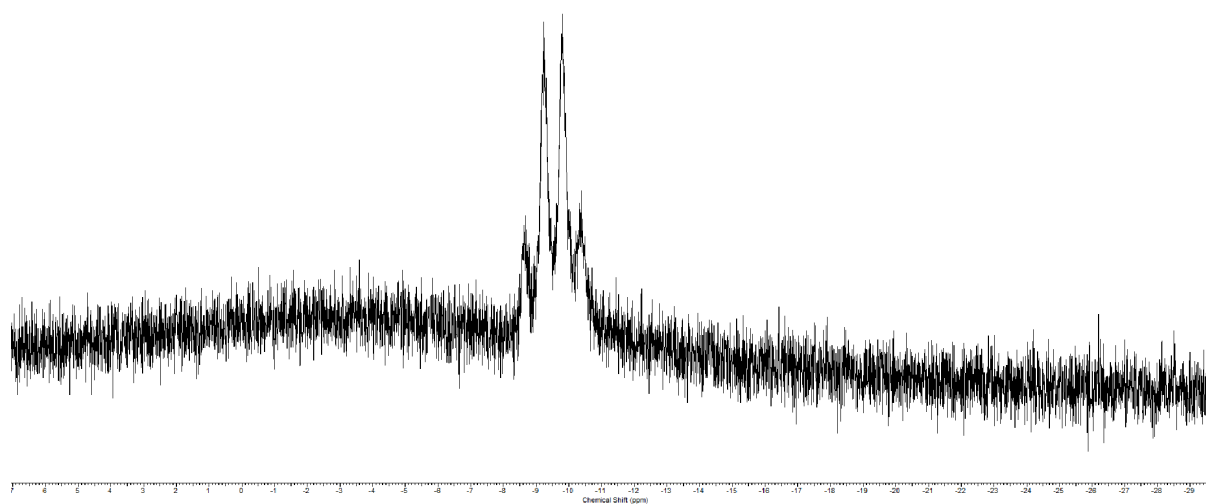

**Figure 2.4**  $^{11}\text{B}$  NMR Spectrum of  $[(\text{PMDETA})\text{AlH}_2]^+[(\text{H}_3\text{B})_2(\text{NMe}_2)]^-$  (**6**) in  $\text{D}_8\text{-THF}$ .



### 3. *In situ* $^{11}\text{B}$ NMR Spectroscopic Studies of Catalytic and Stoichiometric Reactions of 1, 2, 3 and 4 with $\text{Me}_2\text{NHBH}_3$ .

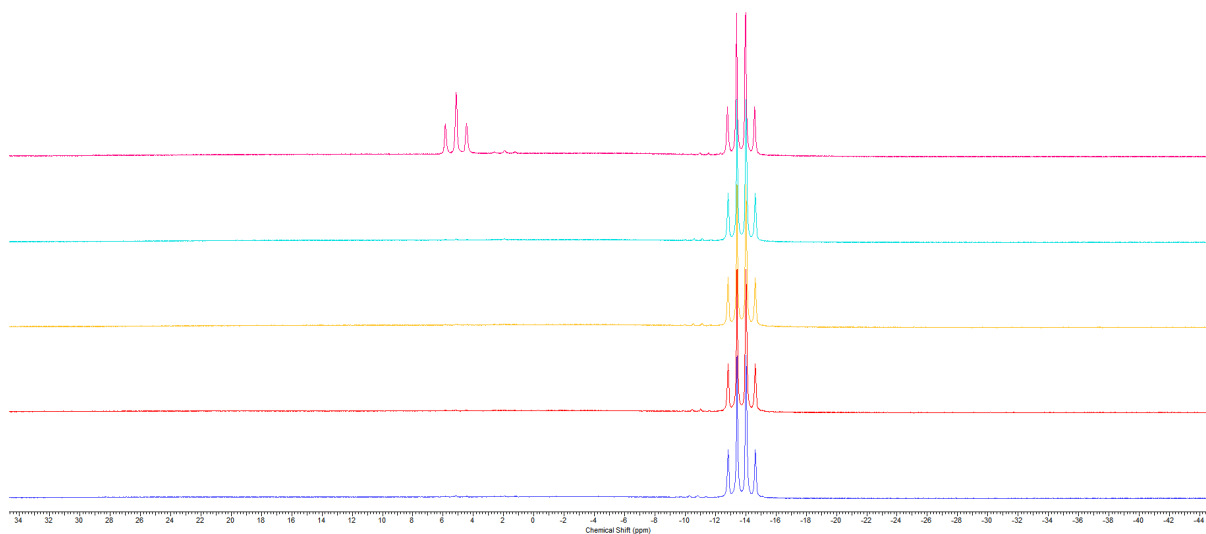

**Figure 3.1**  $^t\text{BuOAlH}_2$  (**1**) (10 mol% loading) +  $\text{Me}_2\text{NHBH}_3$  in  $\text{D}_8\text{-THF}$ . Spectra taken at  $t =$  (from bottom to top) 0 hours, 24 hours, 48 hours, 72 hours and after heating overnight.

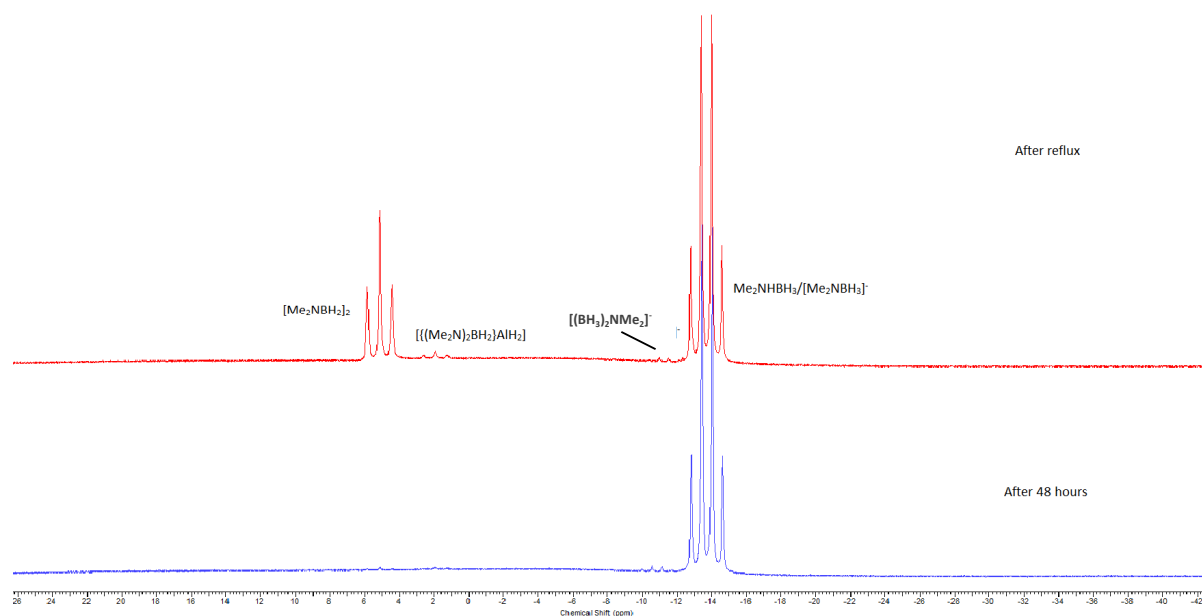

**Figure 3.2** Comparison of the spectra taken after 48 hours and after heating overnight (taken from Figure 3.1).

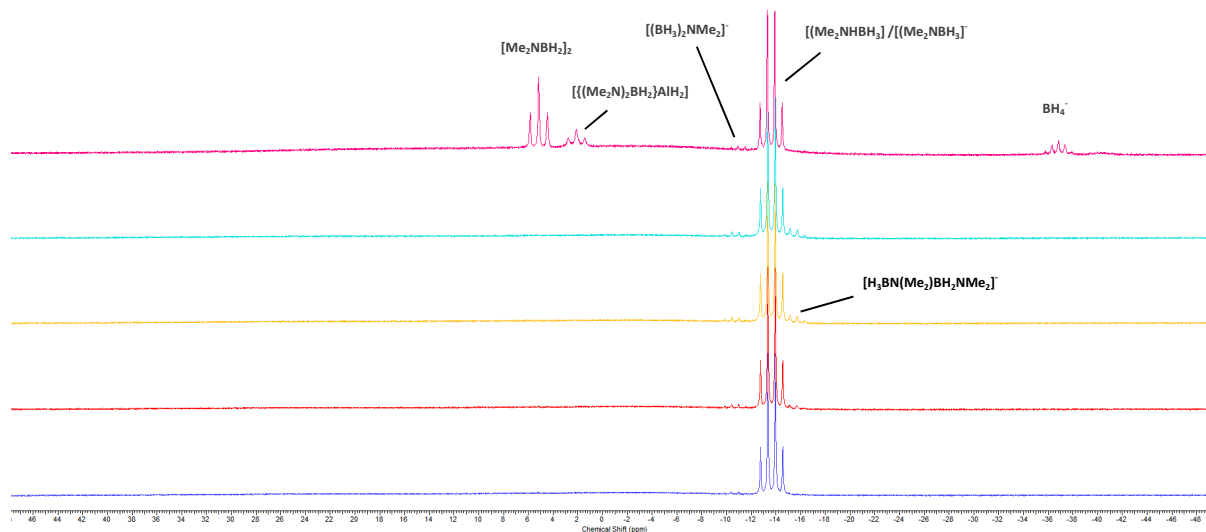

**Figure 3.3** 1 :1 Reaction of <sup>t</sup>BuOAlH<sub>2</sub> (**1**) + Me<sub>2</sub>NHBH<sub>3</sub> in D<sub>8</sub>-THF. Spectra taken at t = (from bottom to top) 0 hours, 24 hours, 48 hours, 72 hours and after heating overnight.

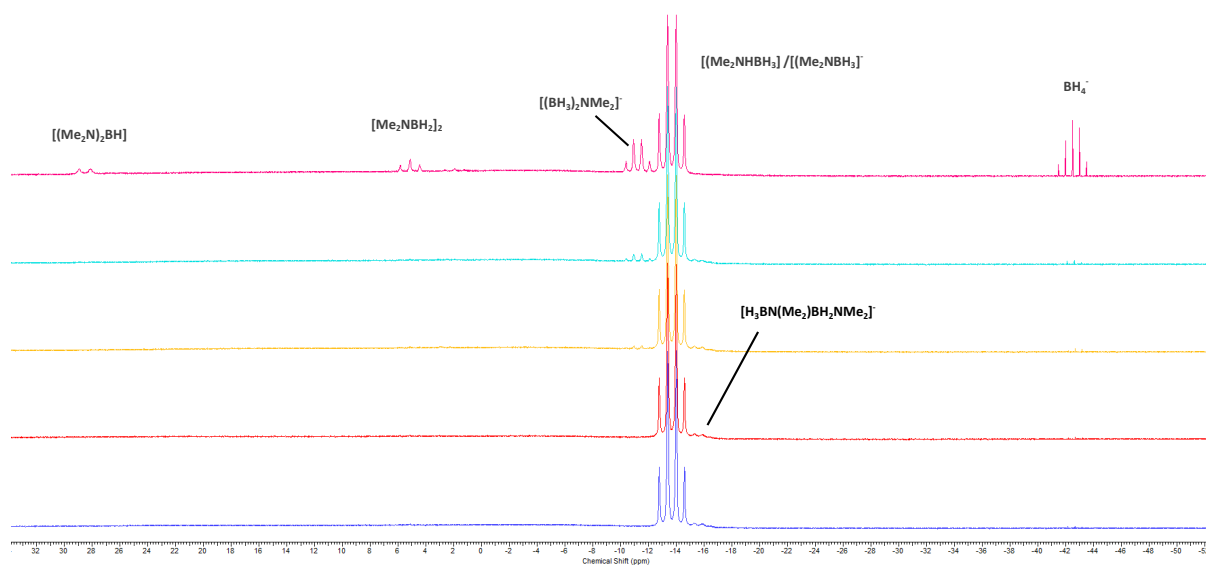

**Figure 3.4**  $(^t\text{BuO})_2\text{AlH}$  (**2**) +  $\text{Me}_2\text{NHBH}_3$  (10 mol% loading) in  $\text{D}_8\text{-THF}$ . Spectra taken at  $t =$  (from bottom to top) 0 hours, 24 hours, 48 hours, 72 hours and after heating overnight.

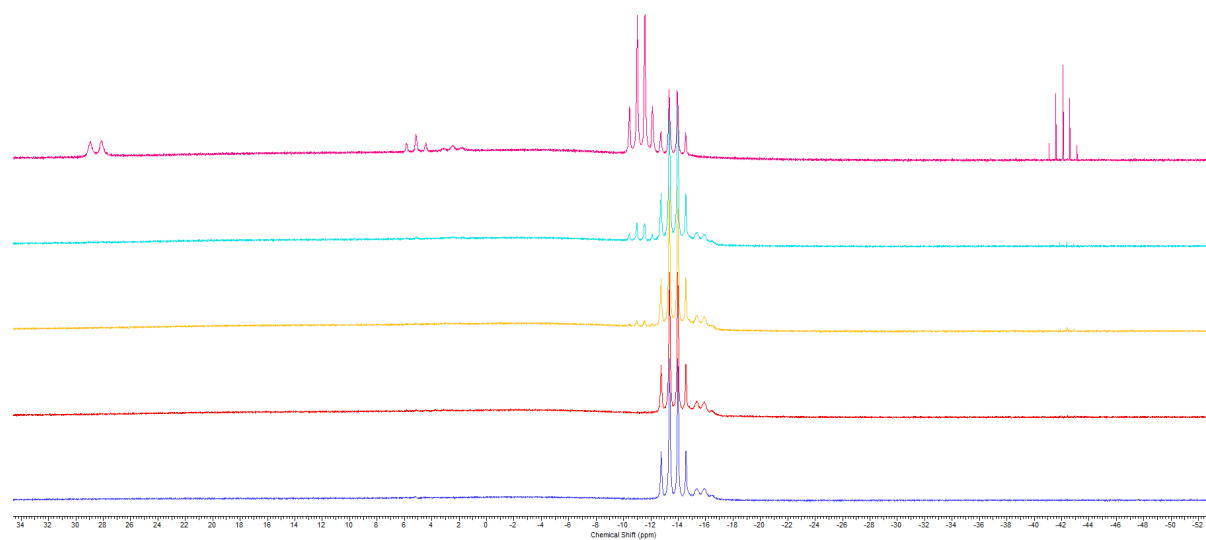

**Figure 3.5** 1 :1 Reaction of  $(^t\text{BuO})_2\text{AlH}$  (**2**) +  $\text{Me}_2\text{NHBH}_3$  in  $\text{D}_8\text{-THF}$ . Spectra taken at  $t =$  (from bottom to top) 0 hours, 24 hours, 48 hours, 72 hours and after heating overnight.

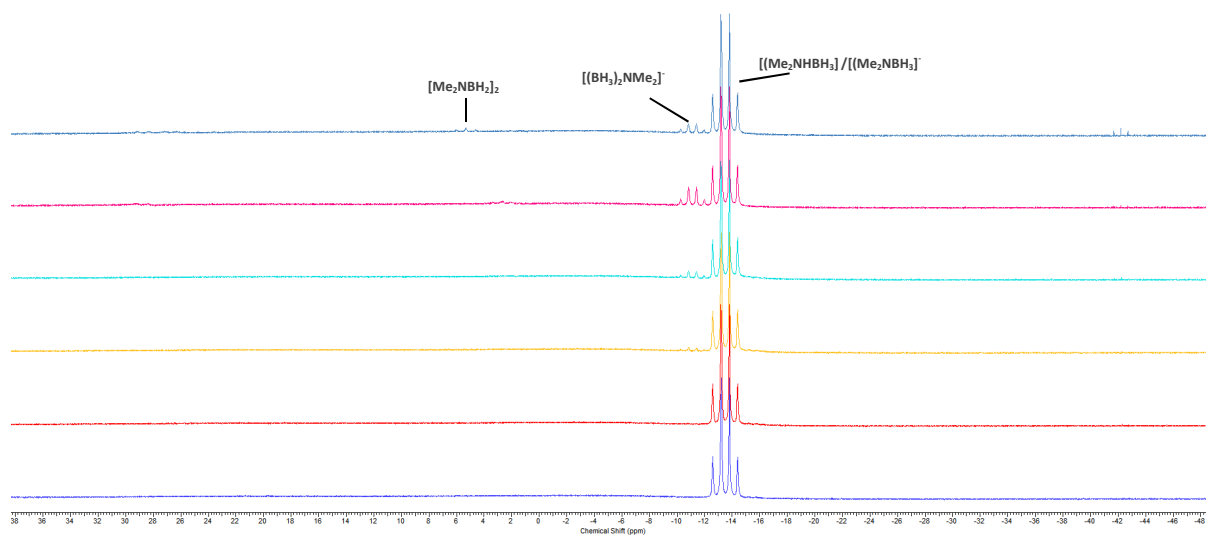

**Figure 3.6**  $(\text{THF})\text{Li}[(\text{tBuO})_2\text{AlH}_2]$  (**3**) (10 mol% loading) +  $\text{Me}_2\text{NHBH}_3$  in  $\text{D}_8\text{-THF}$ . Spectra taken at  $t =$  (from bottom to top) 0 hours, 24 hours, 48 hours, 72 hours, 168 hours and after heating overnight.

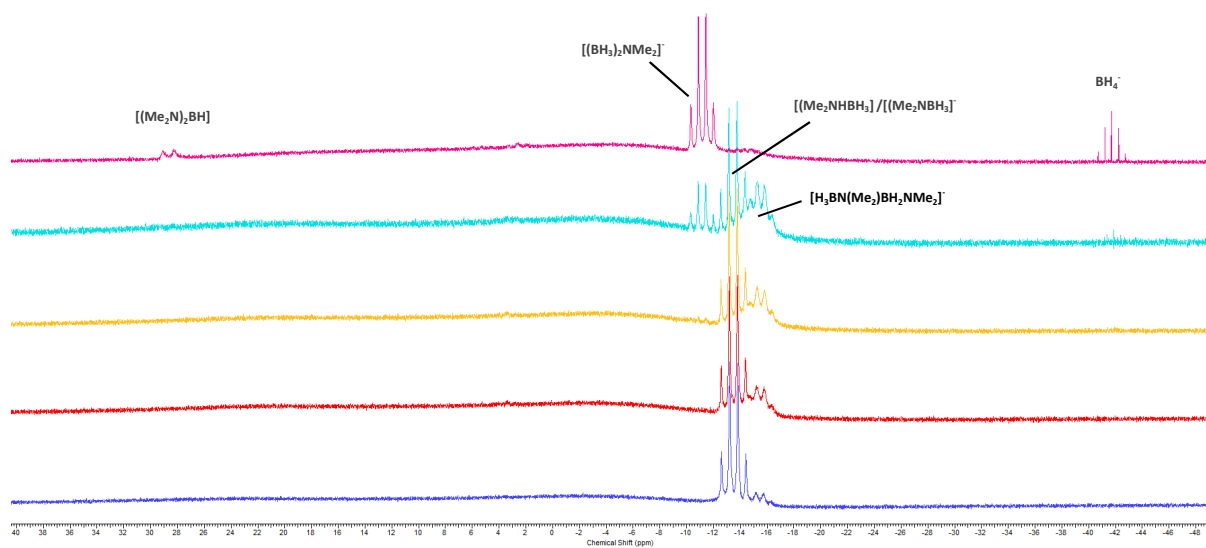

**Figure 3.7** 1 :1 Reaction of  $(\text{THF})\text{Li}[(\text{tBuO})_2\text{AlH}_2]$  (**3**) (10 mol% loading) +  $\text{Me}_2\text{NHBH}_3$  in  $\text{D}_8\text{-THF}$ . Spectra taken at  $t =$  (from bottom to top) 0 hours, 24 hours, 48 hours, 144 hours and after heating overnight.

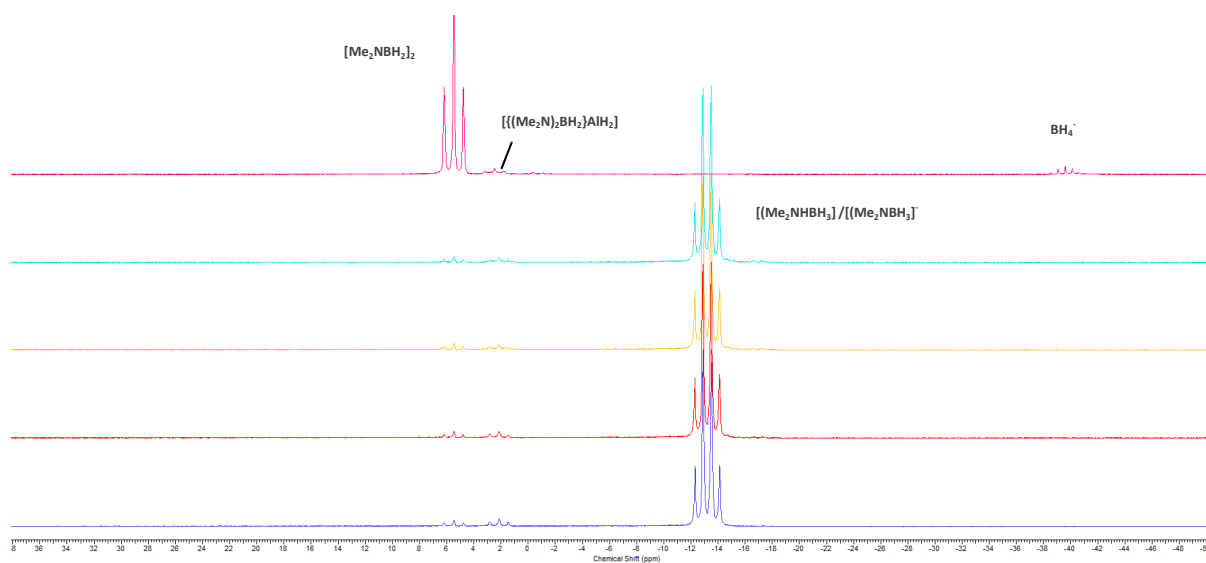

**Figure 3.8**  $t\text{BuOAlH}_2$  (**1**) (10 mol% loading) +  $\text{Me}_2\text{NHBH}_3$  in  $\text{D}_8$ -toluene. Spectra taken at  $t =$  (from bottom to top) 0 hours, 24 hours, 48 hours, 72 hours and after heating overnight.

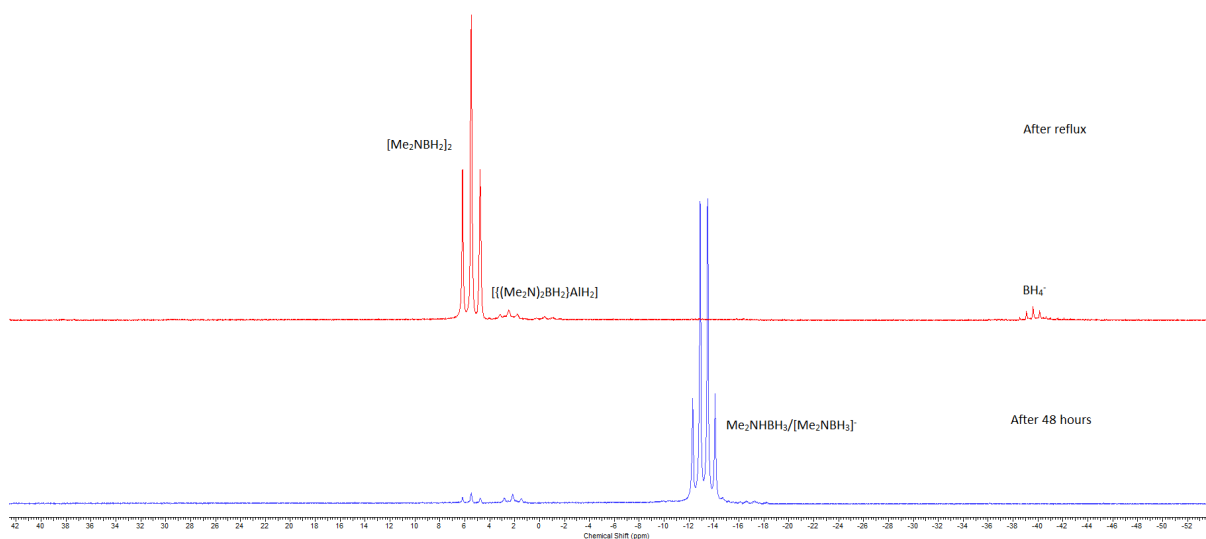

**Figure 3.9** Comparison of the spectra taken after 48 hours and after heating overnight (taken from Figure 3.8).

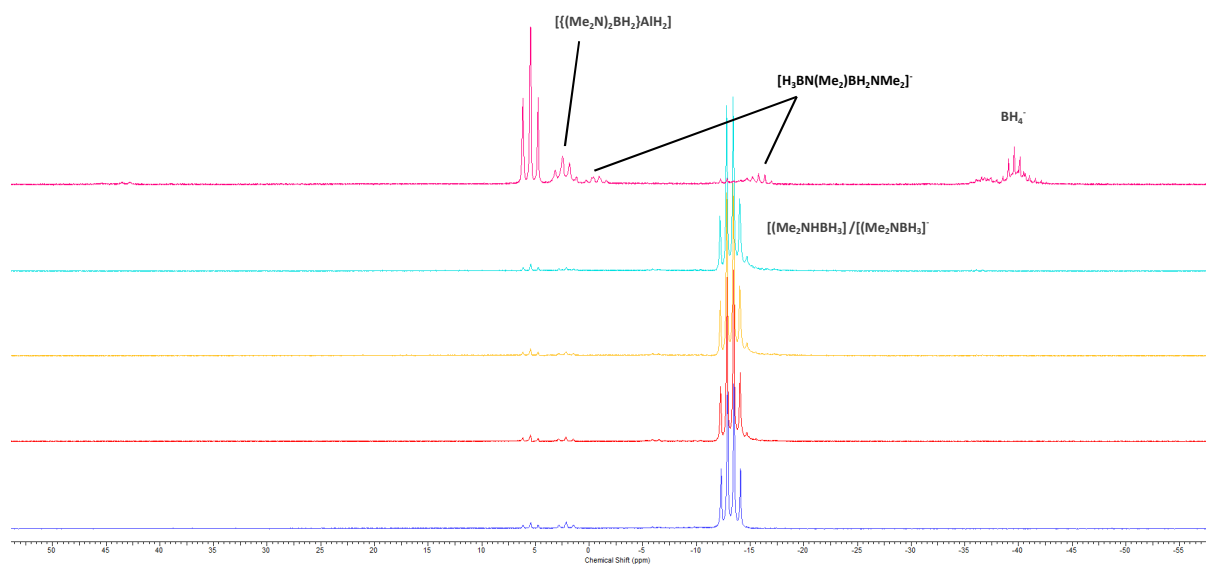

**Figure 3.10** 1 :1 Reaction of  ${}^t\text{BuOAlH}_2$  (**1**) +  $\text{Me}_2\text{NHBH}_3$  in  $\text{D}_8$ -toluene. Spectra taken at  $t =$  (from bottom to top) 0 hours, 24 hours, 48 hours, 72 hours and after heating overnight.

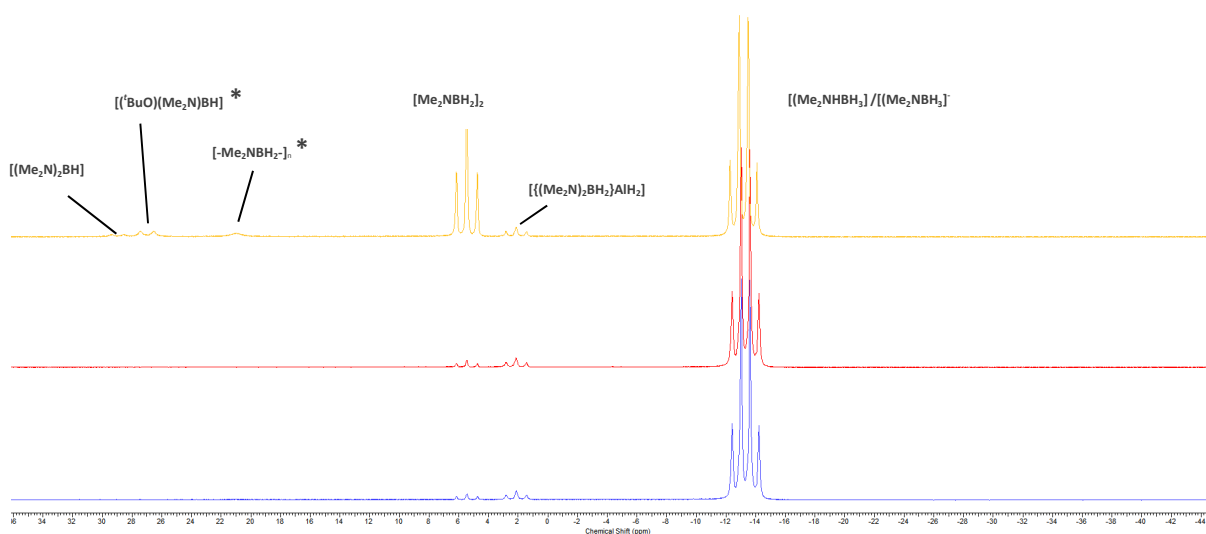

**Figure 3.11**  $({}^t\text{BuO})_2\text{AlH}$  (**2**) +  $\text{Me}_2\text{NHBH}_3$  (10 mol% loading) in  $\text{D}_8$ -toluene. Spectra taken at  $t =$  (from bottom to top) 0 hours, 72 hours and after heating overnight.

**Notes –**

The broad peak at *ca.*  $\delta$ 22 was assigned on the basis of previous studies to the polymer/oligomer  $[-\text{BH}_2\text{NMe}_2-]_n$  (see K. A. Erickson, D. S. Wright, R. Waterman, *J. Organomet. Chem.*, in press and references therein).

The doublet at  $\delta$ 26.8 ( ${}^1J_{\text{BH}} = 128$  Hz) was assigned to the asymmetric chain product  $[({}^t\text{BuO})(\text{Me}_2\text{N})\text{BH}]$  (see P. Belham, M. S. Hill, G. Kociok-Köhn, D. J. Liprot, *Chem. Commun.*, 2013, **49**, 1960). This species results from the nucleophilic addition of a  ${}^t\text{BuO-Al}$  group onto the B-atom of  $[\text{Me}_2\text{N}=\text{BH}_2]$  (see Scheme 5 of the paper).

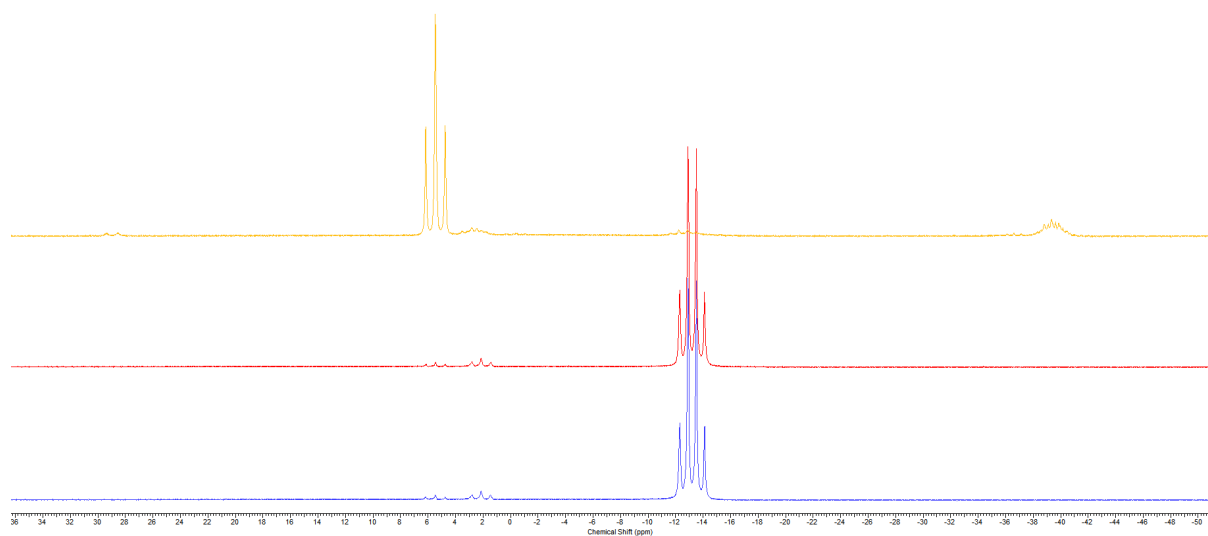

**Figure 3.12** 1 :1 Reaction of  $({}^t\text{BuO})_2\text{AlH}$  (**2**) +  $\text{Me}_2\text{NHBH}_3$  in  $\text{D}_8$ -toluene. Spectra taken at  $t =$  (from bottom to top) 0 hours, 72 hours and after heating overnight.

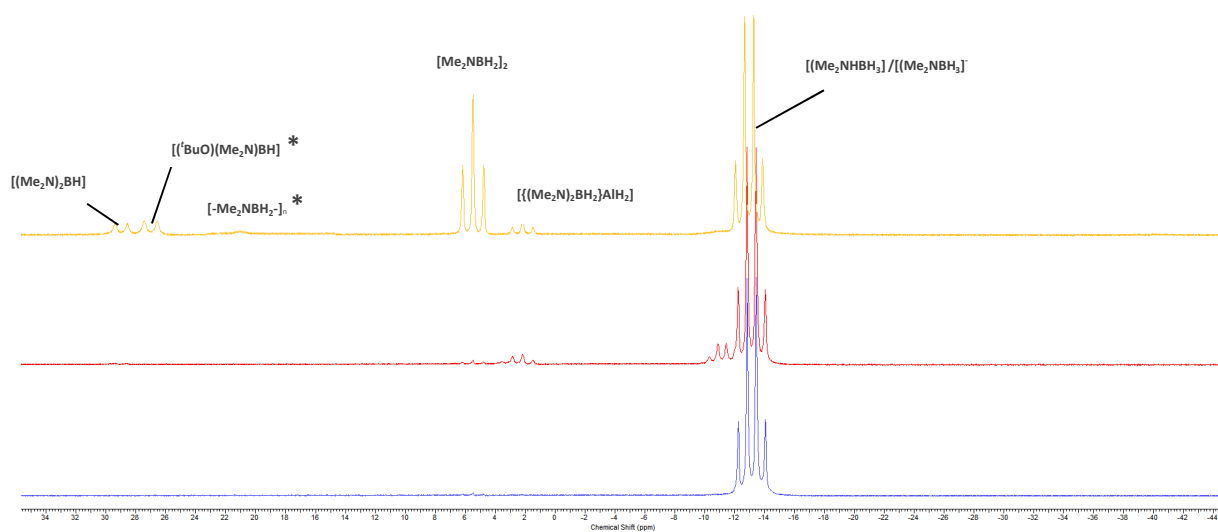

**Figure 3.13**  $(\text{THF})\text{Li}[({}^t\text{BuO})_2\text{AlH}_2]$  (**3**) (10 mol% loading) +  $\text{Me}_2\text{NHBH}_3$  in  $\text{D}_8$ -toluene. Spectra taken at  $t =$  (from bottom to top) 0 hours, 72 hours and after heating overnight (\* see notes to Figure 3.11).

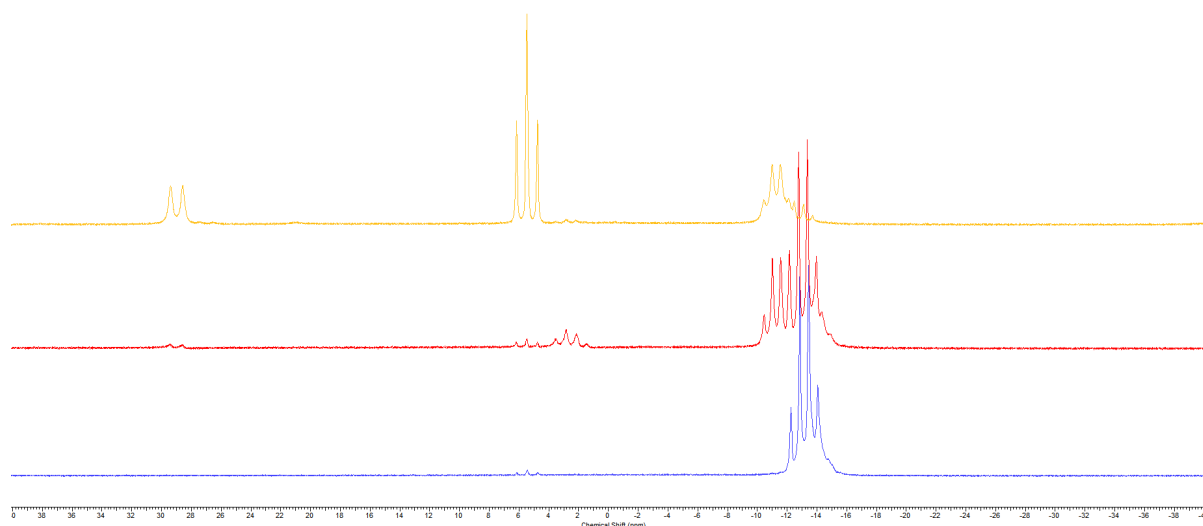

**Figure 3.14** 1 :1 Reaction of (THF)Li[(<sup>t</sup>BuO)<sub>2</sub>AlH<sub>2</sub>] (**3**) + Me<sub>2</sub>NHBH<sub>3</sub> in D<sub>8</sub>-toluene. Spectra taken at t = (from bottom to top) 0 hours, 72 hours and after heating overnight.

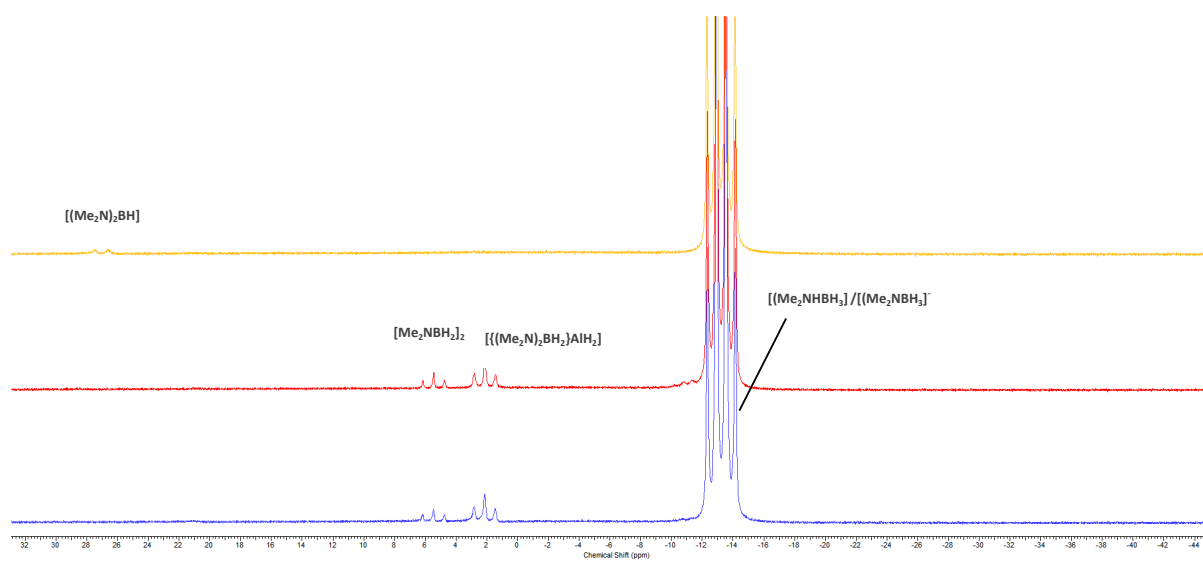

**Figure 3.15** (1,4-dioxane)Li[(<sup>t</sup>BuO)<sub>2</sub>AlH<sub>2</sub>] (**4**) (10 mol% loading) + Me<sub>2</sub>NHBH<sub>3</sub> in D<sub>8</sub>-toluene. Spectra taken at t = (from bottom to top) 0 hours, 72 hours and after heating overnight.



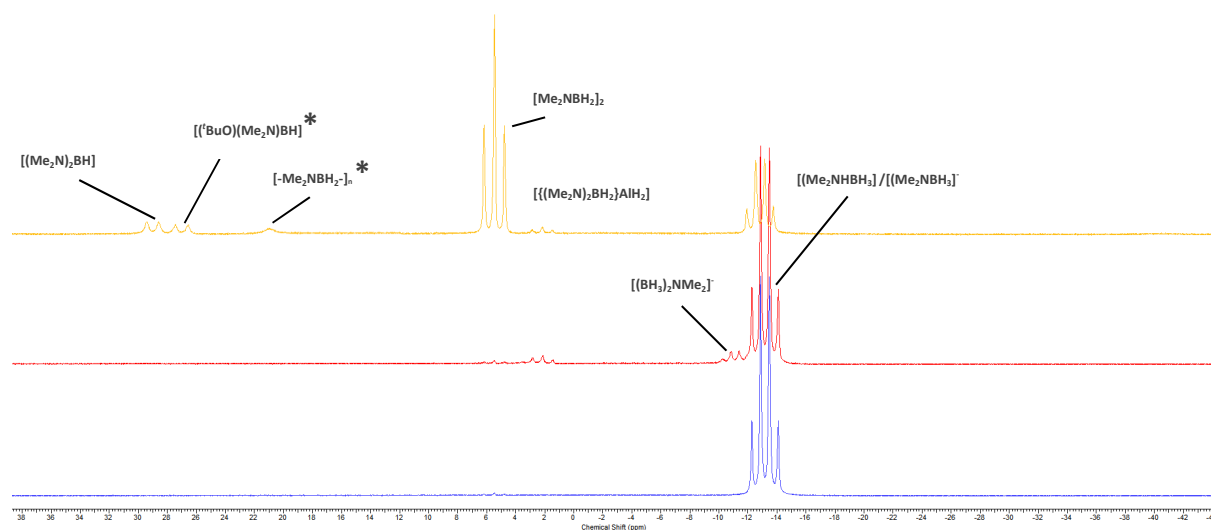

**Figure 3.16** 1 :1 Reaction of (1,4-dioxane)Li[(<sup>t</sup>BuO)<sub>2</sub>AlH<sub>2</sub>] (**4**) + Me<sub>2</sub>NHBH<sub>3</sub> in D<sub>8</sub>-toluene. Spectra taken at t = (from bottom to top) 0 hours, 72 hours and after heating overnight (\* see notes to Figure 3.11).

#### 4. Study of Recation of (<sup>t</sup>BuO)AlH<sub>2</sub> with D<sub>5</sub>-pyridine

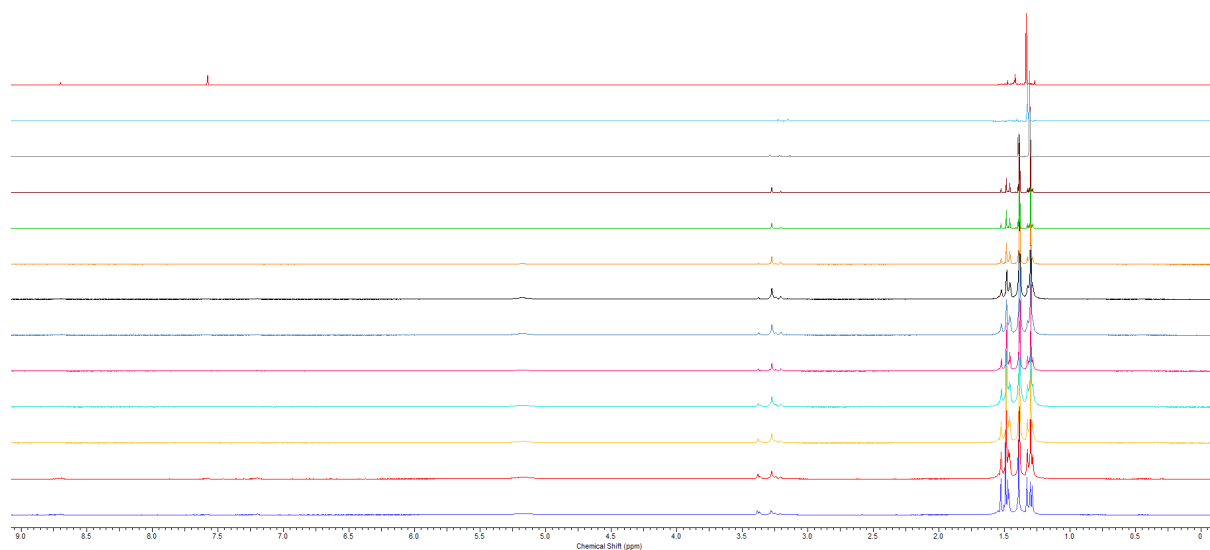

**Figure 4.1** <sup>1</sup>H NMR Spectrum of the Reaction of **1** with D<sub>5</sub>-pyridine. The whole spectrum, showing the change in alkyl region over time. Spectra taken at t = (from bottom to top) 0 mins, 4 mins, 8 mins, 12 mins, 16 mins, 20 mins, 24 mins, 30 mins, 36 mins, 42 mins, 24 hours, 48 hours and after heating overnight.

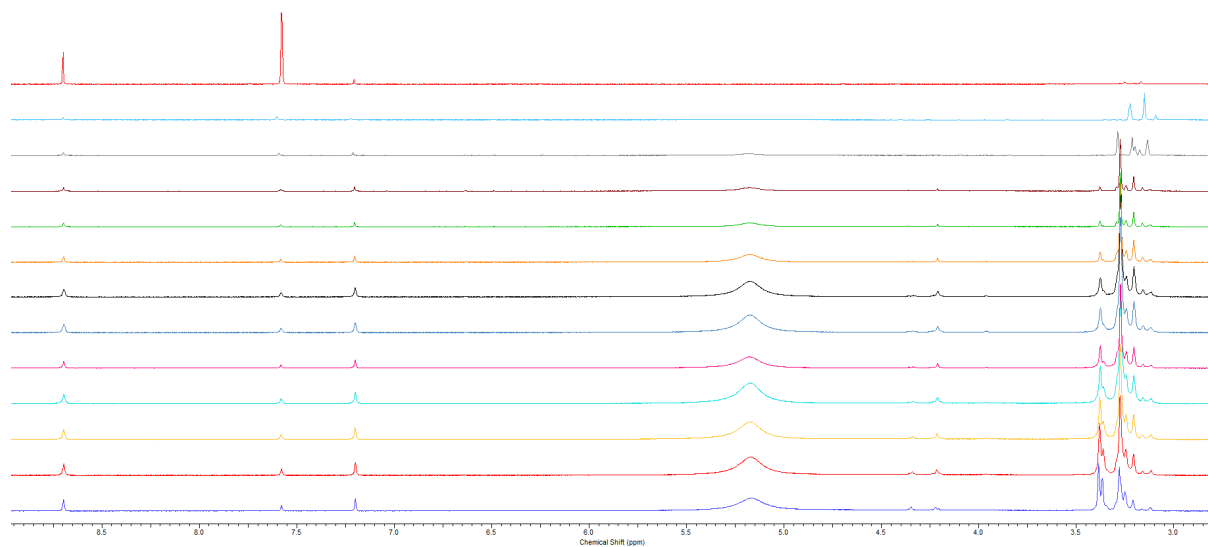

**Figure 5.2** Expansion of the spectrum shown in Figure 5.1 (cropped to show the 3.0 – 9.0 ppm region). Visible is a hydride peak at 5.17 ppm which disappears after longer reaction periods. Also visible are the deuterated pyridine peaks, with the *ortho*-proton appearing furthest downfield and the *meta*-proton appearing furthest upfield. The *ortho:para:meta* ratio at  $t=0$  is 2:1:2, as expected, and over time an exchange reaction occurs.
